# Supplementary material
Source: Elsevier journal article supplement (https://www.sciencedirect.com/science/article/pii/S0001651919300408)

**Tabla 1 Material Suplementario.** Porcentaje de pacientes en los que la laringectomía total consiguió el control local de la enfermedad en función de diferentes variables clínicas y anatomopatológicas.

|  | | **% control local** | **P** |
| --- | --- | --- | --- |
| **Sexo** | Masculino | 80.8% | 0.354 |
| Femenino | 100% |
| **Edad** | <55 | 76.2% | 0.319 |
| 55-65 | 85.0% |
| 65-75 | 78.3% |
| >75 | 89.7% |
| **Localización** | Supraglotis | 77.1% | 0.228 |
| Glotis | 83.5% |
| **T inicial** | T1-2 | 85.2% | 0.020 |
| T3-4 | 72.2% |
| **Tratamiento inicial** | Cirugía parcial ± RT | 76.2% | 0.714 |
| Radioterapia | 82.1% |
| Quimioradioterapia | 78.9% |
| **Intervalo a la recidiva** | <1 año | 85.6% | 0.243 |
| - 1. años | 80.6% |
| >2 años | 75.4% |
| **rpT** | rpT2 | 90.2% | 0.002 |
| rpT3 | 82.1% |
| rpT4 | 69.0% |
| **Márgenes** | Negativos | 87.6% | 0.0001 |
| Cercanos | 62.5% |
| Positivos | 30.4% |
| **rpN** | rpN0 | 84.7% | 0.002 |
| rpN+ | 63.2% |

**Tabla 2 Material Suplementario.** Estudio multivariante considerando una nueva recidiva local tras la laringectomía total de rescate como la variable dependiente.

|  | | **HR (IC 95%)** | **P** |
| --- | --- | --- | --- |
| **T inicial** | T1-2 | 1 |  |
| T3-4 | 1.37 (0.62-3.02) | 0.425 |
| **rpT** | rpT2 | 1 |  |
| rpT3 | 1.40 (0.52-3.75) | 0.502 |
| rpT4 | 1.98 (0.75-5.18) | 0.163 |
| **Márgenes** | Negativos | 1 |  |
| Cercanos | 3.91 (0.84-18.07) | 0.081 |
| Positivos | 12.01 (4.29-33.55) | 0.0001 |
| **rpN** | rpN0 | 1 |  |
| rpN+ | 2.50 (1.03-6.06) | 0.042 |

**Fig 1 Material Suplementario**. Supervivencia específica tras la laringectomía total de rescate en función de la década en la que se llevó a cabo la cirugía.


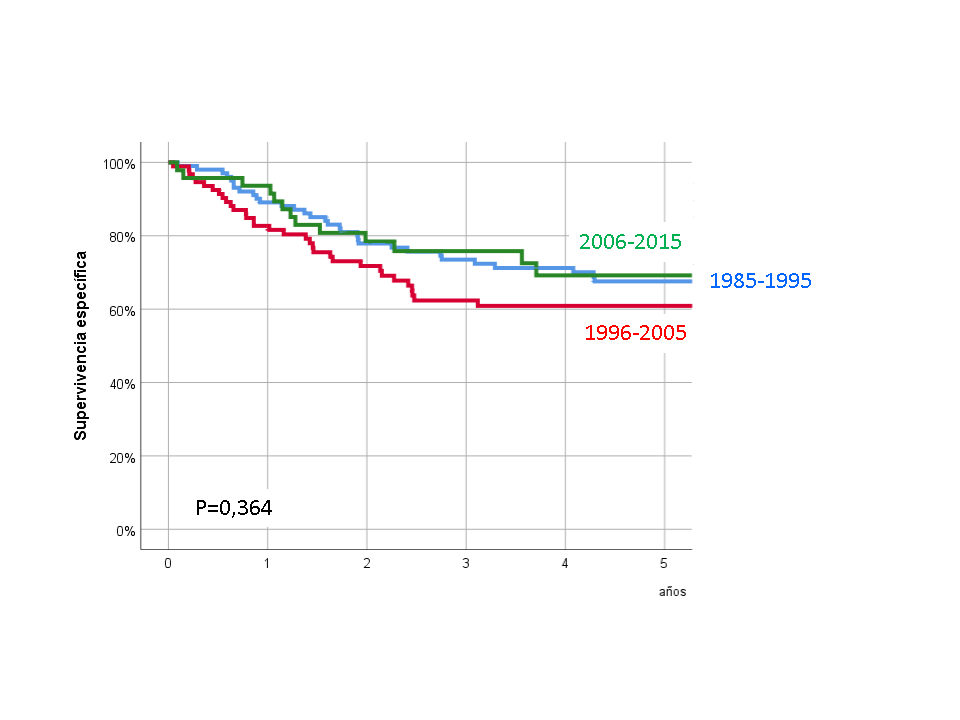

Supplement: mmc1 [file S0001651919300408:mmc1.docx]
